# Supplementary material for: Exogenous IL-33 overcomes T cell tolerance in murine acute myeloid leukemia
Source: PubMed Central journal article supplement (PMC5308636; doi:10.18632/oncotarget.11179), 2016-08-10
Supplement: oncotarget-07-61069-s001.pdf [file oncotarget-07-61069-s001.pdf]

## Exogenous IL-33 overcomes T cell tolerance in murine acute myeloid leukemia

### Supplementary Materials

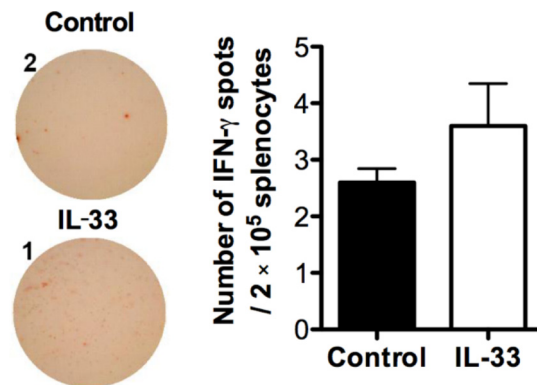

**Supplementary Figure S1: IFN- $\gamma$  production was barely detected without SIY peptide stimulation.** Splenocytes from leukemia-bearing mouse were cultured without SIY peptide for 48 hours. Number of IFN- $\gamma$  producing cells was determined by IFN- $\gamma$  ELISPOT assay.

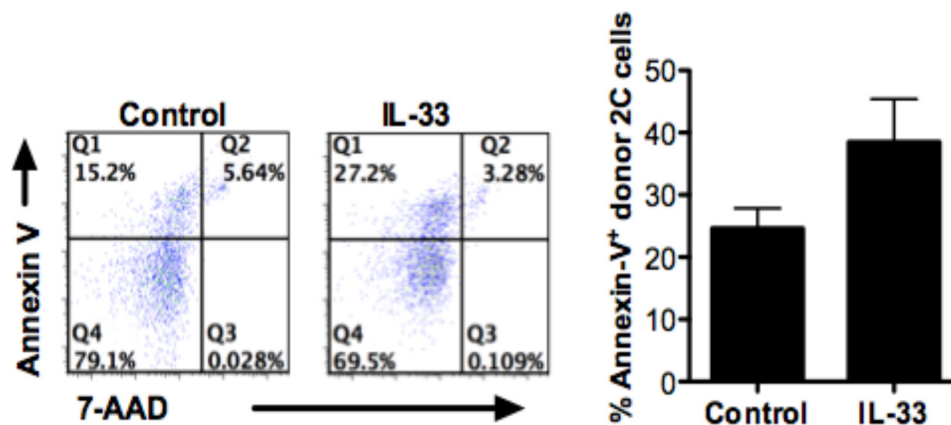

**Supplementary Figure S2: The apoptotic status of adoptively transferred 2C T cells following IL-33 treatment.** The apoptosis of transferred 2C T cells (1B2<sup>+</sup>CD8<sup>+</sup>) in spleen from C1498. SIY-bearing mice treated with IL-33 or control PBS was determined by Annexin V and 7-AAD staining. The *left* panel showed the representative flow dot plots, and the *right* panel indicated the summary of the frequency of apoptotic (Annexin V<sup>+</sup>) 2C T cells.

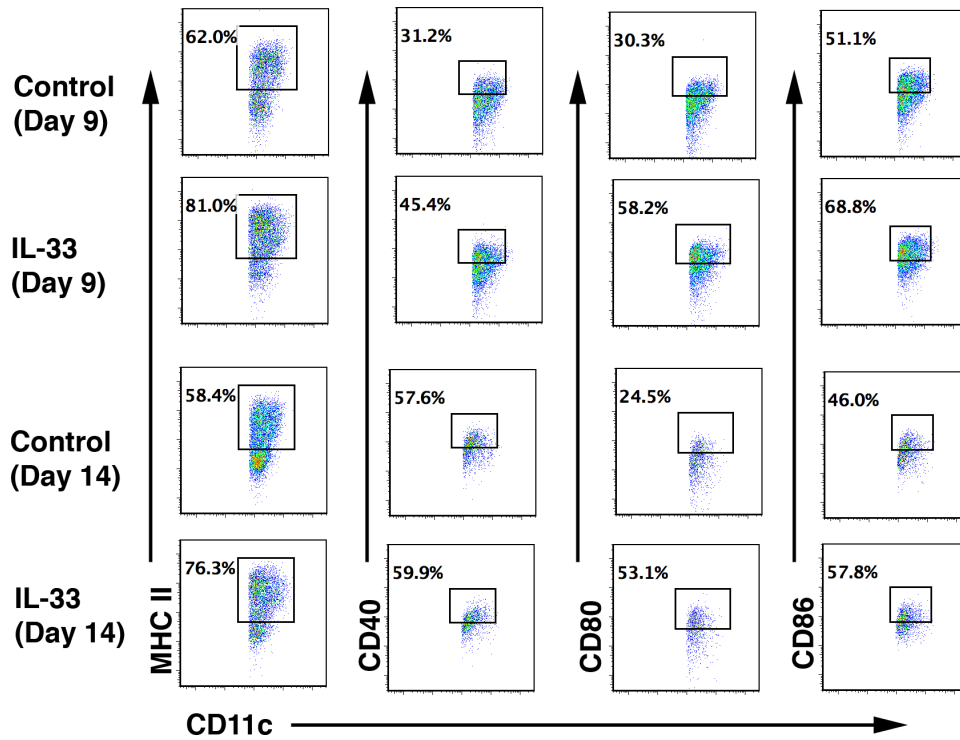

Supplementary Figure S3: Representative flow dot plots of MHC II, CD40, CD80 and CD86 positive splenic DCs in C1498.SIY bearing mice on day 9 and 14.

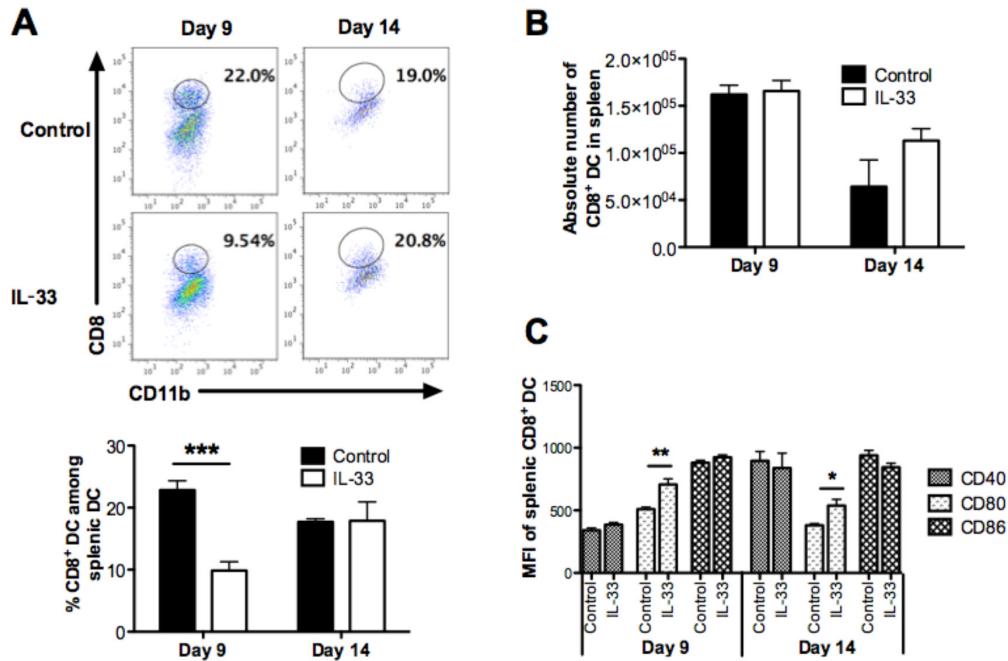

Supplementary Figure S4: The effect of exogenous IL-33 treatment on splenic CD8<sup>+</sup> DCs in C1498.SIY-bearing mice. (A) Representative flow dot plots showed the frequency of CD8<sup>+</sup> cells among splenic CD3-CD11b<sup>low</sup> CD11c<sup>+</sup> DCs (upper) that was summarized in the bar graph (lower,  $n = 5$ ). (B) Absolute numbers of splenic CD8<sup>+</sup> DCs in spleens were calculated. (C) The MFI of CD40, CD80 and CD86 expression on CD8<sup>+</sup> DCs was determined by flow cytometry. \* $p < 0.05$ . \*\* $p < 0.01$ . \*\*\* $p < 0.001$ .
